# Supplementary material for: Cell Cycle Arrest is a Conserved Function of Norovirus VPg Proteins
Source: MDPI journal article supplement (doi:10.3390/v11030217), 2019-03-04
Supplement: s1 [file s1]

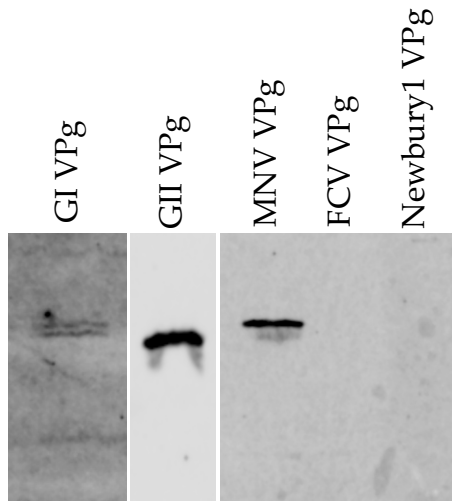

Figure S1: Detection of Norovirus genogroup and Calicivirus VPg protein. VPg proteins that were not detected by mass spectrometry were tagged with a C-terminal Strep-tag II and RAW-Blue cells transfected with 4-5  $\mu$ g of the respective RNA. At 12 hpt cells were harvested, lysed and the protein concentrated on MagStrep "type 3" XT beads. Lysates were probed for the presence of a strep tag by western blotting.
