# Supplementary material for: Cell Cycle Arrest is a Conserved Function of Norovirus VPg Proteins
Source: MDPI journal article supplement (doi:10.3390/v11030217), 2019-03-04
Supplement: s1 [file s1]

Table S1: Detection of norovirus genogroup VPg and calicivirus VPg by mass spectrometry

| Viral VPg    | VPg Sequence <sup>a</sup>                                                                                                                       |
|--------------|-------------------------------------------------------------------------------------------------------------------------------------------------|
| MNV (GV) VPg | GKKGKNKKGRGRPGVFRTRGLTDEEYDEFKKRRESRGGKYSIDYLAADREEREELLE<br>RDEEEAIFGDGFGLKATRRSRKAERAKLGLVSGGDIRARKPIDWNVVGPSWADDD<br>RQVDYGEKINFE            |
| GIII VPg     | SKKGKKGKSNAFSRRGLSDEEYDEYKKIREDRGGNYSIQEYLEDREERFERDLAERQA<br>DDADYDVGAIRQKYFGRGKAACAQRKRIDWNPTGPLWADDDRQVDYDEVIDFQ                             |
| GIV VPg      | GKKKGKNKQGRGRKHTAFSSKGLSDEEYEEFKQLREEKGGKYSIQEYLEDREDRFEEE<br>VAYAQACGGDCDDIEISRIRNSIFRPSRKQRKEERVKLGLVTGSEIRKRKPDDFQPKG<br>KLWADDERTVDYNEKLDFE |
| RHDV VPg     | GVKGKTKRGRGARVNLGNDEYDEWQAARREFVNAHDMTAEYLAMKNKAAM<br>GSDDQDSVMFRSWWTRRQLRPDEDQVTIVGRGGVRNEVIRTRARQAPKGPCTLDD<br>GGFYDNDYE                      |
| HuSV VPg     | AKGKTKHGRGMRHGHRAAGVSLSDDEYDEWRDLMRDWRRDMSVNDLMLRERS<br>ALGMDDDEDVARYRAWLEIRAMRMAGGAYTHATIIGRGGVRDEIIRTSPRRAPTRPQ<br>QHYTEE                     |

<sup>a</sup> Full VPg sequence for each protein with amino acids detected by mass spectrometry shown in red.
